# Supplementary material
Source: MDPI journal article supplement (https://www.mdpi.com/2077-0472/11/12/1299)
Supplement: s1 [file s1]

## Supplementary material

**Table S1.** Untargeted metabolomics of duckweed.

| Compound                              | Class                                                                     | Abundance<br>duckweed<br>extract<br>replicate 1 | Abundance<br>duckweed<br>extract<br>replicate 1 | Abundance<br>duckweed<br>extract<br>replicate 1 | Composite Spectrum<br>(mass and abundance<br>combinations)                                                        | Retention<br>Time |
|---------------------------------------|---------------------------------------------------------------------------|-------------------------------------------------|-------------------------------------------------|-------------------------------------------------|-------------------------------------------------------------------------------------------------------------------|-------------------|
| Dimethylselenoniopropanoate           | Small Molecule                                                            | 74478                                           | 84886                                           | 70276                                           | (178.98517,<br>2464.5198)(187.99007,<br>2270.72)(182.9608,<br>5211.15)(183.96167,<br>801.4133)(184.95905, 939.35) | 1.39              |
| 2-[(2'-Methylsulfanyl)Ethyl]Maleate   | (methylsulfanyl)Alkyl]Maleate                                             | 77559                                           | 71230                                           | 75845                                           | (171.01503,<br>6177.4233)(216.01082,<br>572.87665)                                                                | 1.48              |
| Diethyldithiocarbamate                | Small Molecule                                                            | 77559                                           | 71230                                           | 75845                                           | (152.01387,<br>1155.0533)(171.01503,<br>6177.4233)                                                                | 1.48              |
| Oxalosuccinate                        | Small Molecule                                                            | 77174                                           | 76844                                           | 77449                                           | (186.99101,<br>4130.89)(187.99007, 2209.4434)                                                                     | 1.41              |
| Calystegine A3                        | Small Molecule                                                            | 81856                                           | 83794                                           | 80684                                           | (142.08484,<br>2377.8699)(183.0825, 3850.78)                                                                      | 2.11              |
| Geranylgeranyl Diphosphate            | All-Trans-Polyisoprenyl<br>Diphosphate                                    | 86123                                           | 87273                                           | 84622                                           | (447.17734,<br>6150.0864)(429.16687,<br>917.5533)(431.18222,<br>3778.7034)                                        | 6.05              |
| Sophoraflavanone G                    | Small Molecule                                                            | 86123                                           | 87273                                           | 84622                                           | (447.17734,<br>6150.0864)(429.16687,<br>917.5533)                                                                 | 6.05              |
| Ajmaline                              | Small Molecule                                                            | 92050                                           | 81597                                           | 88761                                           | (309.2019, 3661.43)(350.1971,<br>3145.5168)                                                                       | 11.20             |
| (9Z)-12,13-Dihydroxyoctadeca-9-Enoate | Long-Chain 2,3,4-Saturated<br>Fatty Acid // Monounsaturated<br>Fatty Acid | 101798                                          | 95040                                           | 90053                                           | (313.23108, 339.27)(318.20792,<br>5584.3066)                                                                      | 15.27             |
| N,N-Dihydroxy-L-Dihomomethionine      | L-N,N-<br>Dihydroxypolyhomomethionine                                     | 98217                                           | 96772                                           | 92779                                           | (195.0663,<br>3020.1367)(231.0471, 6451.267)                                                                      | 6.16              |

|                                                         |                           |        |        |        |                                                                                                                               |       |
|---------------------------------------------------------|---------------------------|--------|--------|--------|-------------------------------------------------------------------------------------------------------------------------------|-------|
| N-Benzoyl-L-Glutamate                                   | Monocarboxylic Acid Amide | 98217  | 96772  | 92779  | (231.0471, 6451.267)(252.0836, 1720.1)(274.06537, 3447.4268)                                                                  | 6.16  |
| O-Methylandrocymbine                                    | Alkaloid                  | 97848  | 95347  | 97791  | (385.18433, 6376.547)(409.17734, 2426.6902)                                                                                   | 6.16  |
| 7-Methylxanthosine                                      | Modified Nucleoside       | 99750  | 106340 | 98144  | (299.09546, 6249.813)(286.1096, 590.14667)                                                                                    | 3.73  |
| Antheraxanthin                                          | Xanthophyll               | 165712 | 132244 | 100843 | (567.42096, 77819.625)(568.4239, 22485.781)(568.4261, 5712.5103)(589.4079, 408151.5)(590.4094, 67175.31)(591.4106, 6176.3794) | 14.73 |
| Porphobilinogen                                         | Small Molecule            | 175189 | 184376 | 101341 | (248.07793, 10690.073)(249.08516, 1270.9033)                                                                                  | 8.50  |
| (2E)-Hexadecenal                                        | Small Molecule            | 108944 | 106092 | 104421 | (261.21814, 6611.8267)(243.20782, 1080.2933)                                                                                  | 11.08 |
| Plaunotol                                               | Isoprenoid Derivative     | 104281 | 101141 | 105327 | (307.25943, 4410.75)(329.2407, 3446.4434)                                                                                     | 21.14 |
| Dimethylselenopropanoate-Amine                          | Organosulfur Compound     | 118389 | 89238  | 106531 | (168.0489, 8417.394)(169.05003, 843.27997)(201.0546, 1007.095)                                                                | 1.39  |
| 3-Ureido-Isobutyrate                                    | Ureidocarboxylate         | 118389 | 89238  | 106531 | (168.0489, 8417.394)(169.05003, 843.27997)                                                                                    | 1.39  |
| 1-Naphthaldehyde                                        | Aromatic Aldehyde         | 118876 | 119861 | 107585 | (140.0556, 1599.13)(157.0695, 8059.755)                                                                                       | 1.39  |
| 3,5-Di-C-Glucosyl-2,4,4',6-Tetrahydroxydibenzoylmethane | Small Molecule            | 129509 | 112303 | 114434 | (611.1779, 14230.013)(595.1574, 8364.227)(596.16034, 901.25665)(612.17596, 9758.246)(613.1755, 1982.7767)                     | 15.32 |
| Cyanidin 3-(P-Coumaroyl)-Glucoside                      | Small Molecule            | 129509 | 112303 | 114434 | (595.1574, 8364.227)(596.16034, 901.25665)                                                                                    | 5.38  |

|                                                               |                                                                        |        |        |        |                                                                                                           |       |
|---------------------------------------------------------------|------------------------------------------------------------------------|--------|--------|--------|-----------------------------------------------------------------------------------------------------------|-------|
| 3-Oxo-2-(Cis-2'-Pentenyl)-Cyclopentane-1-(3-Oxo-octanoyl)-CoA | Coenzyme A-Activated Compound                                          | 117065 | 116800 | 115968 | (1054.2856, 4003.3333)(1055.2865, 4273.058)(1056.2852, 3978.8018)(1057.2845, 965.99335)                   | 29.29 |
| Rhamnetin                                                     | Flavonol // Flavone                                                    | 118697 | 116413 | 116717 | (299.043, 9927.094)(300.04398, 3061.5266)                                                                 | 1.39  |
| Chlorophyll-B                                                 | Chlorophyll // Organometallic Compound                                 | 152281 | 127151 | 116984 | (909.53955, 7655.0566)(910.54297, 2982.43)                                                                | 28.48 |
| (-)-Jasmonoyl-1-Aminocyclopropane-1 Carboxylate               | Jasmonoyl-1-Aminocyclopropane-1 Carboxylate                            | 135462 | 123673 | 117560 | (275.15726, 3353.3867)(297.1387, 4715.8135)                                                               | 2.38  |
| 7,8-Dimethoxy-Flavone                                         | Methoxyflavone                                                         | 136562 | 125467 | 117784 | (265.07642, 7197.2266)(268.10068, 301.57666)                                                              | 2.68  |
| (2E,7Z,10Z,13Z,16Z,19Z)-Docosahexaenoyl-CoA                   | Small Molecule                                                         | 133088 | 137109 | 120725 | (1055.2865, 4323.815)(1056.2852, 4092.625)(1057.2837, 950.25)(1056.2852, 3989.6924)(1057.2849, 986.16754) | 29.28 |
| 4-Sinapoyloxybutylglucosinolate                               | Small Molecule                                                         | 143042 | 126874 | 121278 | (602.1202, 8376.609)                                                                                      | 4.96  |
| C <sub>11</sub> H <sub>17</sub> N <sub>3</sub> O              | Nitroso Compound                                                       | 119318 | 116104 | 123645 | (189.12181, 3588.9797)(217.12703, 1954.14)                                                                | 1.71  |
| Gibberellin A8                                                | Gibberellin                                                            | 123608 | 124921 | 123702 | (345.13773, 4178.23)(367.15463, 10226.27)(349.14453, 2678.2566)(386.12866, 5451.4033)                     | 6.16  |
| Tricoumaroyl Spermidine                                       | Amide                                                                  | 130201 | 119931 | 125188 | (585.2796, 7257.0)                                                                                        | 9.33  |
| N-Hydroxy DAP                                                 | Small Molecule                                                         | 130597 | 120844 | 125323 | (188.06934, 199676.42)(189.0718, 20374.412)                                                               | 4.28  |
| Palmitoleoyl-CoA                                              | Long-Chain 2,3,4-Saturated Fatty Acyl Co// Hexadecenoyl-Co(N-C16:1coa) | 155273 | 120218 | 129132 | (981.2685, 4647.8335)(982.2669, 4149.7266)(983.26654, 663.55505)                                          | 28.68 |

|                                                                                |                                            |        |        |        |                                                                                    |       |
|--------------------------------------------------------------------------------|--------------------------------------------|--------|--------|--------|------------------------------------------------------------------------------------|-------|
| L-Dopa                                                                         | Catechol // Non-Proteinogenic A-Amino Acid | 131433 | 130065 | 129391 | (180.0611, 6715.44)(203.05048, 7303.6367)                                          | 2.74  |
| Ancymidol                                                                      | Small Molecule                             | 136265 | 135564 | 129840 | (256.1263, 4600.573)(238.11346, 1696.5366)(261.14188, 2375.03)                     | 1.98  |
| Cyanidin 3-O-[2\O-(Xylosyl)-6\O-(P-Coumaroyl) Glucoside] 5-O-Malonylglucoside" | Anthocyanin                                | 161778 | 123837 | 130966 | (980.2678, 4863.7866)(981.2685, 4535.267)(982.2669, 4051.3118)                     | 28.68 |
| (9Z,12Z)-Hexadeca-9,12-Dienoyl-Coa                                             | Long-Chain Fatty Acyl-Coa                  | 161778 | 138778 | 130966 | (980.2678, 4863.7866)(981.2685, 4535.267)(982.2669, 4051.3118)(983.26654, 638.255) | 28.69 |
| C <sub>21</sub> H <sub>29</sub> O <sub>4</sub>                                 | A Terpenophenolic                          | 129480 | 129040 | 133074 | (327.1968, 4151.2)(350.1821, 5750.1665)                                            | 4.06  |
| 1,3,7,9-Tetramethylurate                                                       | Small Molecule                             | 142591 | 126274 | 133123 | (206.0789, 9017.34)(230.07607, 2467.3267)                                          | 5.96  |
| Pumiloside                                                                     | Alkaloid                                   | 144339 | 141284 | 135382 | (536.15845, 7439.793)(537.1589, 2144.2185)                                         | 24.46 |
| 2'-Hydroxy 3,6,7,4'-Tetramethylquercetagen 3'-O-D-Glucoside                    | Flavonol Derivative                        | 144339 | 141284 | 135382 | (536.1587, 7427.62)(537.15906, 2172.255)(538.1581, 292.58502)                      | 24.46 |
| C <sub>27</sub> H <sub>30</sub> O <sub>11</sub>                                | Polyketide // Phenol // Phenylpropanoid    | 144339 | 141284 | 135382 | (536.15845, 7439.793)(537.1589, 2144.2185)(538.15717, 297.92502)                   | 24.46 |
| Peonidin 3,5-Diglucoside                                                       | Anthocyanin                                | 142099 | 138302 | 138286 | (625.16754, 9068.923)(626.17053, 1017.37665)                                       | 5.61  |
| Kaempferol 3-O-(6\O-Feruloyl)-Glucoside"                                       | Flavonol Derivative                        | 147729 | 138302 | 138286 | (647.1483, 427.02)(625.1673, 9825.37)(626.1703, 953.67)                            | 5.61  |
| 2,4-Dihydroxycinnamoyl-Coa                                                     | Coenzyme A-Activated Compound              | 134824 | 133727 | 138939 | (927.1021, 9818.313)(928.10455, 3321.0066)(911.124, 2012.2266)(913.117, 1497.8265) | 5.98  |
| 9-(Methylsulfanyl)-2-Oxononanoate                                              | Ω(Methylsulfanyl)-2-Oxoalkanoate           | 161652 | 165388 | 143966 | (218.0996, 1281.1567)(240.0815, 7799.4004)                                         | 4.69  |

|                                                     |                                             |        |        |        |                                                                                                                                |       |
|-----------------------------------------------------|---------------------------------------------|--------|--------|--------|--------------------------------------------------------------------------------------------------------------------------------|-------|
| 1-O-Malyl-D-Glucose                                 | C4-Dicarboxylate                            | 142507 | 150967 | 145658 | (296.0625, 4938.677)(300.04398, 1622.4)                                                                                        | 1.54  |
| D,L-5-Fluorotryptophan                              | Small Molecule                              | 165291 | 162382 | 145753 | (222.08049, 1490.1733)(205.06667, 2784.5635)(223.09154, 5200.346)                                                              | 4.18  |
| (E)-9-(Methylsulfanyl)Nonanal Oxime                 | (E)- $\Omega$ (Methylsulfanyl)Alkanal Oxime | 159562 | 155446 | 146105 | (203.13689, 7331.9595)(189.12154, 719.9733)                                                                                    | 2.19  |
| (4ar,10bs)-Noroxomaritidine                         | Noroxomaritidine                            | 152170 | 150779 | 146292 | (253.10962, 8686.25)(256.1261, 394.82333)                                                                                      | 2.19  |
| 4-Methylsalicylate                                  | Small Molecule                              | 156974 | 150325 | 150589 | (151.03748, 10750.716)(135.04266, 2963.7537)                                                                                   | 5.83  |
| N, N-Dihydroxytrihomomethionine                     | L-N,N-Dihydroxypolyhomomethionine           | 206420 | 180690 | 151272 | (222.08049, 1345.2001)(205.0667, 2876.4631)(223.09154, 4699.77)                                                                | 4.18  |
| Coniferaldehyde                                     | Phenylpropanoid                             | 153636 | 148461 | 154157 | (204.06067, 2738.8633)(205.06624, 5933.5034)                                                                                   | 7.36  |
| (S)-Scoulerine                                      | Small Molecule                              | 158542 | 162430 | 156041 | (332.13016, 11749.964)(333.133, 838.12665)                                                                                     | 1.73  |
| 1-Alpha;-Linolenoyl-2-Linoleoyl-Phosphatidylcholine | Phosphatidylcholine-36:5                    | 162548 | 162834 | 158785 | (764.5551, 1356.0034)(803.5339, 11367.724)(804.5368, 4681.1035)                                                                | 21.96 |
| 4-Aminobenzoate                                     | Benzoate                                    | 142069 | 134746 | 161036 | (137.0451, 5859.77)(119.0325, 3259.1)(140.05554, 1384.305)(123.0483, 2824.99)(145.0327, 499.28)                                | 1.43  |
| Trigonelline                                        | Small Molecule                              | 169093 | 156192 | 161036 | (137.04506, 5744.857)(123.04824, 2567.867)(123.05404, 53031.176)(124.0553, 2578.6833)(165.05305, 13206.007)(147.0419, 2517.76) | 2.08  |

|                                                                              |                                                                          |        |        |        |                                                                                                                                |       |
|------------------------------------------------------------------------------|--------------------------------------------------------------------------|--------|--------|--------|--------------------------------------------------------------------------------------------------------------------------------|-------|
| (E)-1-(L-Cysteinyglycin---Yl)-N-Hydroxy-Omega;-(Methylsulfanyl)Hexan-1-Imine | (E)-1-(L-Cysteinyglycin-S-Yl)-N-Hydroxy-Ω(Methylsulfanyl)Alkan-1-Imine   | 168471 | 167117 | 161326 | (319.11096, 10013.68)(365.10678, 4947.8135)                                                                                    | 4.49  |
| 2,7-Dihydroxycadalene                                                        | Terpenoid                                                                | 182067 | 176152 | 163675 | (213.1211, 1403.96)(216.1319, 1860.35)(236.14673, 1216.7233)(216.13199, 1968.6849)(256.12625, 1743.5732)(238.11346, 1753.3232) | 2.19  |
| Hypoxanthine                                                                 | Purine Base // Nucleic Acid Component                                    | 169093 | 162077 | 166452 | (119.03253, 3388.25)(137.04506, 5539.11)                                                                                       | 2.08  |
| 3,5-Dihydroxybiphenyl                                                        | Organic Aromatic Compound                                                | 177912 | 176998 | 166845 | (186.0661, 16456.342)(187.06401, 12130.876)(168.06123, 10504.943)(173.07695, 851.5234)                                         | 1.83  |
| Allysine                                                                     | Small Molecule                                                           | 177912 | 176998 | 166908 | (168.06123, 10504.943)(152.0557, 174875.7)(153.05707, 9151.134)                                                                | 2.26  |
| Gibberellin A24                                                              | Gibberellin                                                              | 165301 | 164208 | 167079 | (367.15463, 9237.667)(349.14453, 2421.6833)                                                                                    | 6.16  |
| Delphinidin 3-O-Rutinoside-7-O-(6-O-(4-O-(Glucosyl)-Oxybenzoyl)-Glucoside)   | Anthocyanidin-3-O-B-D-Glucoside                                          | 174820 | 175251 | 167443 | (1054.2856, 4003.3333)(1055.2865, 4249.165)(1055.2866, 4320.8447)(1056.2852, 3957.02)(1057.2837, 925.645)                      | 29.29 |
| 3-Carboxy-7-(Methylsulfanyl)-2-Oxoheptanoate                                 | 3-Carboxy-Ω(Methylsulfanyl)-2-Oxoalkanoate                               | 166736 | 172757 | 168652 | (237.02582, 13919.153)(238.02693, 2091.5764)                                                                                   | 1.43  |
| L-Hexahomomethionine                                                         | L-Polyhomomethionine                                                     | 175881 | 175264 | 169785 | (216.13196, 1929.09)(261.14188, 2452.2234)(236.14668, 5338.0103)                                                               | 2.06  |
| Dimp                                                                         | Purine 2'-Deoxyribonucleoside 5'-Monophosphate // Nucleic Acid Component | 177356 | 151890 | 170035 | (316.03024, 3151.2568)(335.00964, 7409.867)                                                                                    | 5.98  |

|                                                 |                                                                               |        |        |        |                                                                                 |       |
|-------------------------------------------------|-------------------------------------------------------------------------------|--------|--------|--------|---------------------------------------------------------------------------------|-------|
| 9,10-Epoxy-10,12Z,15Z-Octadecatrienoate         | Small Molecule                                                                | 167624 | 170248 | 171278 | (291.192, 8808.353)(293.2073, 998.9167)(275.19742, 3340.1868)                   | 13.07 |
| 3,7,3',4'-Tetramethylquercetin 2'-O-D-Glucoside | Flavonol Derivative                                                           | 192955 | 187330 | 174395 | (536.15845, 7875.565)(537.1589, 2269.1335)(538.15717, 315.0625)                 | 24.46 |
| 3-Benzoyloxypropyl-Glucosinolate                | Aliphatic Glucosinolate                                                       | 181282 | 175095 | 174416 | (464.05447, 12462.399)                                                          | 5.98  |
| 4'-Hydroxyadonixanthin                          | Ketocarotenoid                                                                | 178743 | 176735 | 174707 | (604.3746, 9439.19)(605.377, 1535.5101)                                         | 6.96  |
| N-(2-Methoxy-4-Pyridyl)-N'-Phenylurea           | Phenylurea-Type Cytokinin                                                     | 98055  | 184376 | 180824 | (248.0779, 10273.101)(249.08527, 1353.0499)                                     | 8.50  |
| Pimeloyl-Coa                                    | Small Molecule                                                                | 180983 | 179777 | 184659 | (927.1021, 10303.329)(928.10455, 3487.54)(911.124, 2114.38)(913.117, 1577.5332) | 5.98  |
| Methylsalicylate                                | Phenylpropanoid                                                               | 189723 | 185864 | 187687 | (137.04506, 3735.11)(153.05693, 8292.696)                                       | 2.16  |
| 3-Phenylpropanoate                              | Aromatic Carboxylate // Monocarboxylate // Phenylalkanoate // Phenylpropanoid | 189788 | 188061 | 194672 | (149.0581, 6252.15)(131.04767, 5045.14)                                         | 2.73  |
| Uroporphyrinogen-III                            | Porphyrin                                                                     | 235160 | 217694 | 194940 | (832.2315, 9443.009)(833.2321, 6981.237)(834.23047, 5569.015)                   | 27.41 |
| Cis-Zeatin                                      | Adenine-Type Cytokinin // Secondary Metabolite                                | 190802 | 194747 | 197066 | (242.09727, 5748.0566)(220.11566, 5669.505)                                     | 2.61  |
| Coniferin                                       | D-Glucoside                                                                   | 201826 | 195493 | 198987 | (345.13858, 1545.5199)                                                          | 5.95  |
| Galactinol                                      | Galactinol-Type-Disaccharide-Sugar-Alcohol // Galactosyl Inositol             | 201826 | 195493 | 198987 | (343.12228, 14000.55)(344.12476, 1283.2034)                                     | 5.95  |
| (Indol-3-yl)Acetyl-L-Tryptophan                 | Indole Derivative // Modified Amino Acid                                      | 201826 | 195493 | 198987 | (343.12228, 14000.55)(344.12476, 1283.2034)(345.13858, 1545.5199)               | 5.95  |

|                                                                             |                                                                 |        |        |        |                                                                                                          |       |
|-----------------------------------------------------------------------------|-----------------------------------------------------------------|--------|--------|--------|----------------------------------------------------------------------------------------------------------|-------|
| 2,4-Diamino-6-Methyl-5,3'-(3-Trifluoromethylphenoxy)Prop-1'-Yloxypyrimidine | Small Molecule                                                  | 201826 | 195493 | 198987 | (344.80087, 1405.1266)(345.1381, 1663.95)(345.1388, 1486.3049)                                           | 5.95  |
| Gibberellin A8-Catabolite                                                   | Gibberellin                                                     | 200769 | 195523 | 199096 | (343.12228, 13067.18)(344.12476, 1197.6566)                                                              | 5.95  |
| L-Homoarginine                                                              | Amino Acid                                                      | 204543 | 197597 | 200117 | (192.13617, 993.99664)(172.13127, 9898.243)                                                              | 3.54  |
| Acetylserine                                                                | O-Acetylated Amino Acid                                         | 197822 | 187426 | 203252 | (130.04866, 6344.6665)(148.0589, 6352.39)(156.0405, 3555.0369)                                           | 1.68  |
| (+)-Catechin                                                                | (2r,3s)-Flavan-3-Ol                                             | 208873 | 195930 | 204294 | (291.09396, 7694.814)(313.07535, 5652.69)                                                                | 7.11  |
| Cryptoxanthin                                                               | Xanthophyll                                                     | 228982 | 200656 | 204624 | (536.43097, 16082.023)(537.4338, 5794.25)                                                                | 27.61 |
| N,N-Dihydroxy-L-Valine                                                      | Small Molecule                                                  | 226622 | 187426 | 205028 | (148.05898, 5053.4165)(130.0487, 7149.9136)(150.0755, 8841.923)(154.0838, 1338.09)(133.05946, 3844.1035) | 1.93  |
| 16-Hydroxypalmitate                                                         | $\Omega$ hydroxy Long-Chain Fatty Acid                          | 199879 | 195044 | 206796 | (294.21094, 10443.86)(276.2006, 1667.9233)                                                               | 14.95 |
| 3-Hydroxy-9-Apo-Delta;-Caroten-9-One                                        | 9-Apo-Carotenone                                                | 214204 | 209951 | 210872 | (209.15108, 3363.0632)(191.14076, 8685.637)                                                              | 8.48  |
| 3S-(4-Hydroxyphenyl)-3-Hydroxy-Propanoyl-Coa                                | Small Molecule                                                  | 210376 | 206947 | 211719 | (911.124, 2114.38)(913.117, 1577.5332)                                                                   | 5.98  |
| 4alpha;-Carboxy-4methyl-5alpha;-Cholesta-8,24-Dien-3ol                      | 3 $\beta$ -Hydroxy-4 $\alpha$ -Carboxy-4 $\beta$ -Methylsteroid | 221312 | 222038 | 217682 | (464.32773, 13078.581)(465.32846, 805.85333)                                                             | 8.41  |
| (22R,23R)-28-Homobrassinolide 22-Sulfate                                    | (22R,23R)-28-Homobrassinolide Sulfate                           | 240801 | 228582 | 218894 | (579.2851, 14139.894)(580.288, 3422.41)                                                                  | 17.29 |
| (S)-Nicotine                                                                | Alkaloid                                                        | 255226 | 233730 | 237564 | (163.12126, 9303.237)(189.1216, 790.12665)                                                               | 2.03  |
| Glutathione                                                                 | Thiol // Glutathione And Derivatives                            | 254288 | 241684 | 238439 | (306.07642, 6539.0938)(307.07956,                                                                        | 2.16  |



|                                                          |                                                                           |        |        |        |                                                                                                |       |
|----------------------------------------------------------|---------------------------------------------------------------------------|--------|--------|--------|------------------------------------------------------------------------------------------------|-------|
|                                                          |                                                                           |        |        |        | 2188.2966)(290.08243,<br>1268.6967)                                                            |       |
| Lutein                                                   | Xanthophyll                                                               | 255484 | 247226 | 239005 | (568.42584,<br>7420.3535)(591.4103,<br>8137.0347)                                              | 6.96  |
| Phosphocholine                                           | Small Molecule                                                            | 237124 | 253769 | 243069 | (185.06384,<br>9106.32)(165.05305, 14771.997)                                                  | 2.13  |
| (4-Hydroxyphenyl)Acetaldehyde                            | Aromatic Aldehyde                                                         | 260664 | 260261 | 253899 | (119.047264,<br>2669.4768)(123.05404,<br>40229.035)(137.0617, 7518.096)                        | 2.13  |
| 3-Aminopropyl-Methyl-Phosphinate                         | Small Molecule                                                            | 260664 | 260261 | 253899 | (137.0617,<br>7518.096)(119.047264,<br>2669.4768)(143.08012,<br>14766.527)(121.0635, 388.8667) | 2.13  |
| 13(S)-Hpote                                              | Hydroperoxy<br>Octadecatrienoate                                          | 269345 | 264662 | 261813 | (309.202, 4671.35)(291.192,<br>8969.46)(293.2073,<br>1016.63666)(332.18655, 385.85)            | 13.07 |
| C <sub>17</sub> H <sub>26</sub> O <sub>4</sub>           | Phenylpropanoid                                                           | 272450 | 278324 | 264962 | (317.17496,<br>13871.684)(318.1784, 778.4567)                                                  | 18.54 |
| Dopamine Quinone                                         | Small Molecule                                                            | 280215 | 276339 | 265590 | (152.069,<br>17273.877)(177.06783,<br>901.39667)                                               | 5.98  |
| Moiramide B                                              | Small Molecule                                                            | 287956 | 270514 | 269764 | (455.2415, 10607.367)                                                                          | 2.54  |
| Methoxydihydrosorgoleone                                 | Small Molecule                                                            | 249183 | 260687 | 270156 | (358.24008,<br>11827.906)(359.23886,<br>2344.6965)                                             | 2.06  |
| (7Z,10Z,13Z,16Z,19Z)-Docosa-<br>7,10,13,16,19-Pentenoate | Long-Chain 2,3,4-Saturated<br>Fatty Acid // Polyunsaturated<br>Fatty Acid | 275731 | 278115 | 272648 | (331.2499,<br>904.7233)(352.23926,<br>17242.744)                                               | 7.58  |
| 71-Hydroxychlorophyll A                                  | Organometallic Compound                                                   | 366399 | 303616 | 277415 | (909.53955,<br>7956.654)(910.54297,<br>3094.4402)                                              | 28.48 |
| 1-L-Myo-Inositol-1-P                                     | Myo-Inositol Monophosphate                                                | 303926 | 280168 | 284249 | (241.00218,<br>16799.184)(242.00298,<br>4429.8633)                                             | 1.40  |
| Dihydrogeranylgeranyl Diphosphate                        | Small Molecule                                                            | 309664 | 290302 | 285417 | (431.18265,<br>13694.043)(432.186,<br>493.61)(473.192, 5508.5405)                              | 6.43  |

|                                                |                                                                                        |        |        |        |                                                                                                  |       |
|------------------------------------------------|----------------------------------------------------------------------------------------|--------|--------|--------|--------------------------------------------------------------------------------------------------|-------|
| Dimethylsulfonio-2-Hydroxybutanoate            | Monocarboxylate // Organosulfur Compound                                               | 280101 | 302421 | 286450 | (165.05305, 16083.914)(147.0419, 2958.5967)                                                      | 2.13  |
| Caffealdehyde                                  | Phenylpropanoid                                                                        | 280101 | 302421 | 286450 | (165.05305, 16083.914)(168.06136, 3322.867)(147.0419, 2958.5967)                                 | 2.13  |
| S-Sulfanylgutathione                           | Perthiol // Glutathione-S-Conjugate                                                    | 301388 | 290986 | 291147 | (320.0419, 17607.883)(321.04028, 543.1467)                                                       | 5.98  |
| Dtmp                                           | Pyrimidine 2'-Deoxyribonucleoside 5'-Monophosphate // Pyrimidine                       | 301388 | 290986 | 291147 | (320.0419, 17607.883)(321.04028, 543.1467)(307.0376, 339.43)                                     | 5.98  |
| 5-(Methylsulfanyl)-2,3-Dioxopentyl 1-Phosphate | Small Molecule                                                                         | 320216 | 292057 | 295251 | (242.00304, 5403.555)(244.00064, 552.75)(223.98726, 1843.37)(225.98691, 743.12)(246.961, 507.12) | 1.40  |
| Melilotate                                     | Aromatic Compound                                                                      | 106925 | 310391 | 295276 | (165.0531, 9839.504)(148.71303, 6172.0396)(150.0569, 1194.25)                                    | 2.13  |
| 3-Carboxy-6-(Methylsulfanyl)-2-Oxohexanoate    | 3-Carboxy- $\Omega$ (Methylsulfanyl)-2-Oxoalkanoate                                    | 290899 | 267437 | 295627 | (219.02428, 411.75)(222.027, 1124.14)                                                            | 1.39  |
| (S)-Laudanosine                                | Alkaloid                                                                               | 316045 | 304443 | 295889 | (359.2145, 15060.899)(360.21765, 915.8833)(363.20987, 1191.2833)                                 | 16.00 |
| L-Proline                                      | Proteinogenic Amino Acid // Non-Polar Amino Acid // Neutral Amino Acid // L-Amino Acid | 328297 | 289426 | 300265 | (116.069496, 9727.293)(124.05526, 1281.8534)                                                     | 1.66  |
| 2,4-Dinitrobenzenesulfonyl Chloride            | C-Nitro Compound                                                                       | 315111 | 317304 | 305855 | (268.94333, 15580.423)(270.94205, 1107.08)                                                       | 1.74  |
| Picrocrocin                                    | Apocarotenoid // D-Glucoside                                                           | 317358 | 308695 | 311899 | (335.17892, 365.76)(331.18365, 14486.21)(332.18655, 335.87332)                                   | 13.07 |
| C <sub>22</sub> H <sub>31</sub> O <sub>4</sub> | A Terpenophenolic                                                                      | 338639 | 320981 | 312483 | (359.22214, 80795.63)(360.2246, 6347.5522)(361.22635,                                            | 11.78 |

|                                                   |                                           |        |        |        |                                                                                                   |       |
|---------------------------------------------------|-------------------------------------------|--------|--------|--------|---------------------------------------------------------------------------------------------------|-------|
|                                                   |                                           |        |        |        | 1753.11)(361.23038, 17998.852)(362.23337, 1989.8633)(367.21472, 1765.7601)                        |       |
| 2-[(5'-Methylsulfanyl)Pentyl]Malate               | 2-[( $\Omega$ methylsulfanyl)Alkyl]Malate | 298130 | 299378 | 312651 | (248.07796, 10368.217)(249.08525, 992.1433)                                                       | 8.50  |
| Gibberellin A12                                   | Gibberellin                               | 323351 | 320697 | 315232 | (331.1827, 12112.144)(315.18918, 30034.904)(316.19238, 3266.6335)                                 | 15.35 |
| 4-Isopropylbenzyl Alcohol                         | Phenol                                    | 347013 | 282785 | 317232 | (133.104, 17294.5)(177.1002, 2758.5234)                                                           | 2.08  |
| Gibberellin A14-Aldehyde                          | Gibberellin                               | 329414 | 313805 | 317235 | (331.18365, 14708.3)(332.18655, 339.67)(333.2, 24026.771)(334.2028, 3532.3965)(335.21194, 246.73) | 13.07 |
| Pelargonidin-3,5-Diglucoside-5-O-Caffeoylgucoside | Small Molecule                            | 337827 | 329484 | 322112 | (758.21356, 12720.977)(759.21405, 7676.28)(760.21234, 5762.725)(761.2116, 1627.8082)              | 26.69 |
| 3,6-Dihydronicotinate                             | Vitamin                                   | 603169 | 359389 | 325856 | (129.02092, 29977.682)(130.0231, 527.5)                                                           | 1.39  |
| Mercuriphenyl Acetate                             | Small Molecule                            | 344899 | 336670 | 326407 | (341.01947, 441.485)(315.0104, 2503.09)(321.0174, 6827.44)(321.01752, 7075.1553)                  | 5.98  |
| Triketide Pyrone                                  | Polyketide                                | 339995 | 294949 | 326546 | (186.06609, 20388.055)(187.06401, 14977.72)(188.06792, 731.03)                                    | 1.40  |
| Gossyol-6,6'-Dimethyl Ether                       | Sesquiterpenoid                           | 367658 | 354196 | 353011 | (547.2439, 18856.697)(548.2465, 3710.57)                                                          | 11.93 |
| 3-(Indol-3-Yl)Acrylate                            | Indole Derivative                         | 381570 | 310489 | 357023 | (168.04892, 6797.305)(169.05003, 843.27997)(187.06401, 15647.742)(188.06792, 779.6533)            | 1.39  |

|                                                      |                                                                               |         |        |        |                                                                                                           |       |
|------------------------------------------------------|-------------------------------------------------------------------------------|---------|--------|--------|-----------------------------------------------------------------------------------------------------------|-------|
| 2-Amino-4-Methyl-5-Hydroxyethylthiazole              | Thiazole                                                                      | 375100  | 371337 | 360717 | (164.06673, 752.9067)(164.0407, 18520.76)                                                                 | 5.98  |
| Tetrahydropteroyl-Alpha;-Glutamylglutamate           | Tetrahydrofolate                                                              | 391672  | 368579 | 361081 | (573.18695, 28352.74)(574.18945, 6278.5493)                                                               | 7.46  |
| 1-Hydroxyglucobrassicin                              | Indolic Glucosinolate                                                         | 369149  | 364791 | 361407 | (464.05447, 10904.603)(469.02234, 11598.173)                                                              | 5.98  |
| Kaempferol-3-O-Gentiobioside-7-O-Alpha;-L-Rhamnoside | Flavonol-3-O-[D-Glucopyranosyl(1->6)D-Glucopyranoside]-7-O-L-Rhamnopyranoside | 379289  | 367652 | 362814 | (758.21356, 12976.849)(759.21405, 7940.65)(760.21234, 5961.029)(761.2116, 1684.1034)                      | 26.69 |
| Imidazole Acetol-Phosphate                           | Small Molecule                                                                | 322194  | 295960 | 362891 | (222.02693, 1949.6234)(241.00218, 13537.944)(242.00298, 3513.0283)(224.15733, 1111.91)(224.9951, 1720.25) | 1.40  |
| 4-Coumaroylhexanoylmethane                           | Small Molecule                                                                | 367414  | 370320 | 372320 | (261.1417, 21385.906)(262.1445, 746.75336)                                                                | 3.64  |
| L-Pipecolate                                         | Pipecolate                                                                    | 406380  | 384357 | 378988 | (130.08643, 14044.91)(156.07504, 881.48)(136.06084, 61000.887)(137.06163, 2034.9468)                      | 1.69  |
| (S)-2-Hydroxyglutarate                               | (2S)-2-Hydroxycarboxylate // 2-Hydroxyglutarate                               | 440871  | 466540 | 379084 | (147.02177, 6662.763)(129.0209, 23436.146)(130.0231, 406.34402)(171.01503, 1512.3467)                     | 1.39  |
| (9Z,12Z)-Octadecadien-6-Ynoate                       | Long-Chain 2,3,4-Saturated Fatty Acid // Polyunsaturated Fatty Acid           | 384084  | 387467 | 383630 | (275.1975, 17163.863)(276.2006, 1343.2533)                                                                | 14.95 |
| 13-Apo-Carotenone                                    | Apocarotenoid // Ketone                                                       | 412517  | 393968 | 390543 | (259.2029, 20195.85)(260.20596, 2260.1533)(241.19238, 4177.15)                                            | 11.93 |
| 6-Methyl-H2-Pterin                                   | Small Molecule                                                                | 1421871 | 473063 | 390719 | (177.0674, 5854.8965)(160.05531,                                                                          | 4.49  |

|                                                      |                                                                      |        |        |        |                                                                                                              |       |
|------------------------------------------------------|----------------------------------------------------------------------|--------|--------|--------|--------------------------------------------------------------------------------------------------------------|-------|
|                                                      |                                                                      |        |        |        | 10893.087)(205.06633, 3695.3167)                                                                             |       |
| 5-Methyl-Tetrahydropteroyl-Alpha;- Glutamylglutamate | Small Molecule                                                       | 422297 | 401020 | 391928 | (591.1972, 24750.225)(592.1999, 4966.6035)                                                                   | 5.80  |
| P-Nitrophenyl-Chitobiose                             | Chitodextrin // P-Nitrophenyl-Modified Glycoside // C-Nitro Compound | 411336 | 417328 | 401909 | (545.1921, 22531.266)(546.19476, 4434.98)                                                                    | 6.73  |
| (9Z)-12,13,17-Trihydroxyoctadeca-9-Enoate            | Long-Chain 2,3,4-Saturated Fatty Acid // Monounsaturated Fatty Acid  | 408715 | 405069 | 409730 | (311.21802, 6841.11)(334.20255, 9367.167)(335.214, 1706.8301)                                                | 13.43 |
| Estrone                                              | Estrogen-Like Compound                                               | 446005 | 419364 | 412184 | (270.1542, 169156.14)(271.15637, 17916.18)(272.15805, 462.79498)(252.15448, 31423.14)(253.15741, 2411.9475)  | 7.68  |
| Deoxycholate                                         | Bile Acid                                                            | 480591 | 449857 | 415932 | (391.27795, 3374.5266)(414.26425, 14399.946)(415.26672, 213.97)                                              | 21.96 |
| Pyropheophorbide A                                   | Chlorin                                                              | 448707 | 440420 | 432594 | (533.2647, 19206.514)(534.26715, 4089.1565)                                                                  | 3.81  |
| L-Homomethionine                                     | L-Polyhomomethionine                                                 | 449046 | 376112 | 434388 | (164.07256, 20600.463)(165.07542, 547.36334)(187.06401, 15447.953)(168.0489, 6884.3364)(169.05003, 683.4467) | 1.46  |
| Deoxypumiloside                                      | Alkaloid                                                             | 473649 | 461269 | 447719 | (479.1819, 21809.625)(480.1846, 3290.1033)(481.19565, 1852.0101)                                             | 8.48  |
| 1-(3,4-Dihydroxyphenyl)-5-Hydroxy-3-Decanone         | Phenylpropanoid                                                      | 483124 | 466122 | 464674 | (281.1694, 31692.344)(282.17245, 2827.91)                                                                    | 16.04 |
| 3,6,7,2',4'-Pentamethylquercetagenin                 | Flavonol Derivative                                                  | 488765 | 469655 | 468895 | (405.10477, 27493.773)(406.10754, 2730.7532)                                                                 | 6.16  |

|                                        |                                                             |        |        |        |                                                                                                                                                                                           |       |
|----------------------------------------|-------------------------------------------------------------|--------|--------|--------|-------------------------------------------------------------------------------------------------------------------------------------------------------------------------------------------|-------|
| (E)-Glutaconate                        | Small Molecule                                              | 392474 | 371641 | 471308 | (129.02092, 28934.646)(130.0231, 573.85)(114.015076, 1844.8184)                                                                                                                           | 1.39  |
| 6-O-D-Glucosyl-6-Hydroxyflavone        | Flavone                                                     | 494147 | 477627 | 474146 | (386.12866, 3830.0032)(405.10477, 25966.344)(406.10754, 2579.0466)                                                                                                                        | 6.16  |
| Bixin                                  | Carboxylic Ester // Carotenoate<br>// Monocarboxylate       | 489371 | 494288 | 475146 | (393.20444, 26483.727)(394.2073, 3149.5)                                                                                                                                                  | 4.49  |
| Olivetol                               | Polyketide                                                  | 520883 | 507250 | 488995 | (181.1204, 12121.641)(203.10207, 16648.857)                                                                                                                                               | 11.05 |
| Isatin                                 | Indole Derivative                                           | 414102 | 396012 | 491552 | (129.02095, 32845.406)(130.0231, 580.02997)(152.01387, 1109.1333)                                                                                                                         | 1.39  |
| N-Acetyl-Farnesylcysteine              | N $\alpha$ -Acetylated Amino Acid // L-Cysteine-S-Conjugate | 513794 | 506527 | 493913 | (349.1941, 20502.0)(350.1971, 1689.7201)                                                                                                                                                  | 11.20 |
| Chlorophyll-A                          | Chlorophyll A                                               | 600451 | 544958 | 518258 | (893.54535, 9173.577)(894.5484, 3507.2634)                                                                                                                                                | 29.00 |
| D-Erythro-Imidazole-Glycerol-Phosphate | Small Molecule                                              | 543919 | 506335 | 520541 | (237.02582, 10636.5)(238.02693, 1594.3701)(239.02397, 1680.68)(237.02673, 8569.72)(238.02773, 891.01)(239.02464, 1033.6066)(222.027, 1983.7965)(241.00218, 12888.825)(242.00298, 3394.72) | 1.41  |
| Ajmaline                               | Ajmalan-Type Monoterpenoid<br>Indole Alkaloid               | 562086 | 552147 | 531386 | (309.2019, 2014.7367)(349.1941, 21008.475)(350.1971, 1735.4867)                                                                                                                           | 11.20 |
| 3''-Hydroxy-Geranylhydroquinone        | Quinol                                                      | 551684 | 559686 | 531761 | (263.1575, 31451.26)(264.16058, 2582.5732)(290.16763, 1792.0067)                                                                                                                          | 2.04  |

|                                          |                                                |         |         |        |                                                                                                              |       |
|------------------------------------------|------------------------------------------------|---------|---------|--------|--------------------------------------------------------------------------------------------------------------|-------|
| 16-Methoxytabersonine                    | Small Molecule                                 | 555037  | 542139  | 538492 | (349.1941, 20797.227)(350.1971, 1710.9268)                                                                   | 11.20 |
| Indole-3-Lactate                         | Indole Derivative                              | 408421  | 604590  | 539416 | (187.064, 8303.636)(188.06815, 238.185)(205.066, 8309.0205)                                                  | 1.39  |
| L-Dehydro-Ascorbate                      | Small Molecule                                 | 4433724 | 4175755 | 564423 | (175.01651, 24108.172)(158.35303, 199.97667)(160.02051, 86.395)(197.00375, 22525.979)                        | 0.53  |
| (-)-Jasmonoyl-L-Valine                   | Jasmonoyl-L-Valine                             | 577073  | 567836  | 567521 | (309.202, 4354.8066)(331.18365, 15169.37)(332.18655, 356.65665)                                              | 13.07 |
| Cycloheximide                            | Small Molecule                                 | 599155  | 605102  | 572440 | (281.16968, 41226.543)(282.17264, 4029.3367)(263.1575, 31451.26)(264.16058, 2582.5732)                       | 9.04  |
| Lotaustralin                             | D-Glucoside // Nitrile                         | 276837  | 384175  | 574422 | (247.126, 422.96)(268.10233, 358236.28)(269.1042, 35386.49)(270.10574, 2757.0566)                            | 2.16  |
| (4Z,7Z,10Z,13Z,16Z,19Z)-Docosahexaenoate | Ω3 Fatty Acid // Long-Chain Fatty Acid         | 590436  | 588791  | 574482 | (332.21417, 22312.787)(333.21545, 2743.9167)                                                                 | 2.04  |
| 7-O-Methylmyricetin                      | Flavonol Derivative                            | 578414  | 583762  | 576627 | (333.05386, 25717.719)(334.05685, 1767.1533)                                                                 | 7.36  |
| Dimethylsulfoniopropanoate-Amine         | Organosulfur Compound                          | 618771  | 591559  | 581600 | (144.07933, 30345.053)(145.08244, 1637.7965)                                                                 | 5.14  |
| S-Methyl-L-Methionine                    | Methylated Amino Acid // Organosulfur Compound | 606368  | 513623  | 591039 | (164.07256, 19312.932)(165.07542, 513.1533)(187.06401, 14482.457)(188.06792, 593.9667)(169.05003, 640.73334) | 1.41  |

|                                                                      |                                                               |         |        |        |                                                                                      |       |
|----------------------------------------------------------------------|---------------------------------------------------------------|---------|--------|--------|--------------------------------------------------------------------------------------|-------|
| Myristate                                                            | Long-Chain 2,3,4-Saturated Fatty Acid // Saturated Fatty Acid | 631332  | 612728 | 603705 | (250.18855, 17206.033)(251.19078, 800.68335)                                         | 3.04  |
| 3,3'-Di(Indol-3-Yl)Methane                                           | Indole-Phytoalexin                                            | 626423  | 630681 | 613055 | (247.12593, 1645.2567)(269.1042, 23367.248)(270.10577, 1656.8033)                    | 2.09  |
| Lacinilene C                                                         | Terpenoid                                                     | 626423  | 630681 | 613055 | (247.12593, 1645.2567)(252.10718, 59644.668)(253.10962, 6152.7563)                   | 2.09  |
| 2,3-Dioctanoylglyceramide                                            | Small Molecule                                                | 661873  | 628119 | 617404 | (339.2482, 552.9033)(340.25497, 564.9033)(362.2352, 12837.691)(363.24106, 581.64667) | 10.67 |
| Nicotinamide D-Ribonucleotide                                        | Nicotinamide Mononucleotide                                   | 616149  | 621434 | 619496 | (333.05386, 25717.719)(334.05685, 1767.1533)                                         | 7.36  |
| Methyl (2E,6E)-Farnesoate                                            | Methyl Farnesoate                                             | 666094  | 640384 | 626543 | (250.18855, 17619.615)(251.19078, 828.11005)                                         | 3.04  |
| Glycyrrhetaldehyde                                                   | Triterpenoid                                                  | 641445  | 626308 | 629247 | (454.34085, 22108.445)(455.34302, 1566.3151)(477.3252, 20202.008)(478.3274, 989.27)  | 6.11  |
| N-Acetyl-S-Geranylgeranyl-L-Cysteine                                 | N-Acetyl L-Amino Acid // L-Cysteine-S-Conjugate               | 654872  | 644730 | 642171 | (416.27164, 33778.32)(417.2723, 293.38)(419.28003, 63334.71)(420.28174, 1996.6232)   | 8.04  |
| (4S)-4-(5,5-Dimethylcyclohex-1-En-1-Yl)Cyclohex-1-Ene-1-Carbaldehyde | Sesquiterpenoid                                               | 660044  | 661527 | 644612 | (241.15234, 22943.225)(242.15497, 571.29004)                                         | 2.18  |
| (13S,14R)-13-O-Acetyl-1,8-Dihydroxy-N-Methylcanadine                 | Alkaloid                                                      | 705903  | 696367 | 689437 | (390.14014, 33177.02)(391.13205, 5615.94)                                            | 6.16  |
| Nicotinamide                                                         | Aliphatic Amide // B Vitamin                                  | 1053836 | 804759 | 707998 | (107.042755, 11957.7)(123.05413,                                                     | 1.70  |



|                               |                                                                                                 |        |        |        |                                                                                                                         |       |
|-------------------------------|-------------------------------------------------------------------------------------------------|--------|--------|--------|-------------------------------------------------------------------------------------------------------------------------|-------|
|                               |                                                                                                 |        |        |        | 61244.453)(124.0553, 2886.8098)(147.04207, 1292.8334)(127.02316, 109531.54)(128.02443, 30842.924)(129.02097, 26217.133) |       |
| 4-Prenylphlorisovalerophenone | 2-Acyl-4-Prenylphloroglucinol                                                                   | 760959 | 725978 | 710005 | (277.13828, 35098.92)(278.14114, 3319.33)                                                                               | 13.70 |
| N-Hydroxypentahomomethionine  | L-N-Hydroxypolyhomomethionine                                                                   | 749253 | 744051 | 736941 | (217.10265, 29541.139)(218.10559, 504.435)(220.11559, 2911.1367)(239.09747, 4565.6504)                                  | 2.44  |
| Geranyl D-Glucopyranoside     | Monoterpenol // Monosaccharide                                                                  | 756942 | 737548 | 739583 | (316.1923, 2519.2366)(317.205, 31454.154)(318.20792, 4201.7603)(339.18607, 1921.1268)                                   | 15.25 |
| Kauralexin A3                 | Kauralexin                                                                                      | 773052 | 744429 | 743811 | (317.205, 34724.31)(318.20792, 4655.2095)                                                                               | 15.25 |
| Dihydrozeatin-7-N-Glucose     | Adenine-Type Cytokinin Glucoside                                                                | 763634 | 762380 | 771287 | (384.1818, 43779.062)(385.18433, 5626.3667)(409.17734, 2141.1965)                                                       | 6.16  |
| L-Tyrosine                    | Uncharged Polar Amino Acid // Aromatic L-Amino Acid // Proteinogenic Amino Acid // L-Amino Acid | 825680 | 785040 | 785849 | (182.07953, 42852.066)(183.0825, 2786.1301)(187.05681, 2512.0366)                                                       | 2.13  |
| Harmalol                      | Alkaloid                                                                                        | 761574 | 800374 | 806701 | (182.07942, 33861.082)(183.0825, 2946.2136)(201.1078, 139.57)                                                           | 2.53  |
| Serotonin                     | 2-Arylethylamine                                                                                | 873648 | 839623 | 833044 | (177.10027, 3808.5667)(179.11617, 14485.953)(182.07933, 22611.43)(183.0825, 2886.5735)                                  | 2.07  |
| L-Canavanine                  | Small Molecule                                                                                  | 873648 | 839623 | 833044 | (177.1002, 2861.8733)(182.07953, 44339.03)(183.0825, 2886.5735)                                                         | 2.13  |

|                                                          |                                                                  |         |        |        |                                                                                                      |       |
|----------------------------------------------------------|------------------------------------------------------------------|---------|--------|--------|------------------------------------------------------------------------------------------------------|-------|
| (+)-7-Epi-12-Hydroxy-12-Oxojasmonoyl-L-Isoleucine        | 12-Hydroxy-12-Oxojasmonoyl-L-Amino Acid                          | 887684  | 874072 | 850897 | (333.1481, 41046.99)(334.15088, 3996.9434)                                                           | 3.41  |
| D-Mannitol                                               | Hexitol                                                          | 610660  | 882441 | 878272 | (182.07942, 35506.867)(183.0825, 3127.7402)(166.0707, 260.2)(205.066, 7229.35)(187.05731, 2194.16)   | 2.11  |
| Lathyrine                                                | Small Molecule                                                   | 760962  | 882441 | 878272 | (182.07942, 33281.65)(183.0825, 2893.7703)(166.0707, 260.2)(205.0659, 4983.72)(187.05952, 4989.5234) | 2.11  |
| Chlorophyllide B                                         | Chlorophyllide // Organometallic Compound                        | 922765  | 890914 | 879628 | (610.17737, 20327.559)(611.1778, 9600.599)                                                           | 25.26 |
| 2-Decarboxy-Cyclo-Dopa                                   | Alkaloid                                                         | 975322  | 915531 | 886076 | (136.07213, 62966.676)(137.0749, 1718.8383)(177.06828, 6064.928)                                     | 3.47  |
| 2-Phenylacetamide                                        | Small Molecule                                                   | 975322  | 915531 | 886076 | (136.07213, 62966.676)(137.0749, 1718.8383)                                                          | 3.47  |
| (4E,6E)-1-(4-Hydroxyphenyl)-7-Phenylhepta-4,6-Dien-3-One | Secondary Metabolite                                             | 929921  | 883884 | 891674 | (261.1283, 44606.53)(262.13132, 3054.077)                                                            | 3.03  |
| Quinidinone                                              | Alkaloid                                                         | 896789  | 890346 | 901173 | (305.1539, 51173.94)(306.15677, 4709.4634)                                                           | 3.56  |
| Delta;-Carotene                                          | Carotene                                                         | 1019100 | 990557 | 921972 | (536.43115, 29312.17)(537.4339, 10507.3125)                                                          | 27.80 |
| 3-Methylthiopropylhydroxamic-Acid                        | (E)-Ω(Methylsulfanyl)Alkyl-Thiohydroximate // Aliphatic Aldoxime | 964747  | 916131 | 922496 | (152.01384, 89.579994)                                                                               | 0.09  |
| 8',10-Diapocarotene-8',10-Dial                           | Aldehyde                                                         | 974962  | 952885 | 929980 | (239.14604, 4205.6167)(261.1283, 46120.168)(262.13132, 3171.0566)                                    | 3.03  |

|                                                                |                                           |          |         |         |                                                                                        |       |
|----------------------------------------------------------------|-------------------------------------------|----------|---------|---------|----------------------------------------------------------------------------------------|-------|
| 3,8-Divinyl Protochlorophyllide A                              | Chlorophyllide // Organometallic Compound | 986179   | 945245  | 933800  | (610.1774, 20799.129)(611.1778, 9922.528)(613.17535, 1347.225)                         | 25.26 |
| Kaempferide 3-O-D-Glucopyranosyl -(1->2)-O-Alpha;-L-Rhamnoside | Flavonol 3-O-Glycoside                    | 986179   | 945245  | 933800  | (610.1774, 20799.129)(611.1778, 9922.528)(612.1758, 6447.187)(613.17535, 1347.225)     | 25.26 |
| 10',6-Diapocarotene-10',6-Dial                                 | Apocarotenoid // Aldehyde                 | 987198   | 972529  | 985338  | (283.1716, 4964.5664)(305.1539, 51173.94)(306.15677, 4709.4634)                        | 3.56  |
| 8'-Hydroxyabscisate                                            | Absciscic Acid Derivative                 | 1020677  | 995420  | 991407  | (284.0962, 50348.113)(285.09818, 4614.947)                                             | 2.14  |
| 5-Methylthioadenosine                                          | Small Molecule                            | 1018254  | 1018696 | 1020552 | (298.09363, 47515.184)(299.09546, 4999.8535)(320.07462, 1557.7433)                     | 3.73  |
| 2-Methyl-6-Farnesyl-1,4-Benzoquinol                            | Quinol                                    | 1023131  | 1034972 | 1025049 | (352.23926, 14796.983)(331.2499, 778.12177)                                            | 7.58  |
| 10hydroxytaxa-4(20),11-Dien-5alpha;-Yl Acetate                 | Small Molecule                            | 1023131  | 1034972 | 1025049 | (331.2499, 778.12177)(352.23926, 14796.983)                                            | 7.58  |
| 5-(Hydroxymethyl)-2-Methyl-4(1H)-Pyrimidinone                  | Pyrimidine                                | 1085914  | 1059885 | 1026306 | (123.05404, 52645.188)(124.0553, 2403.1633)(165.05315, 8697.897)(147.04196, 1778.6167) | 1.99  |
| 4-Nitrophenol                                                  | C-Nitro Compound // Phenol                | 1.28E+07 | 2063492 | 1041228 | (143.00046, 128095.65)(144.0017, 5599.4624)                                            | 2.02  |
| Dopamine                                                       | Catechol                                  | 1278816  | 1012290 | 1088909 | (136.0721, 54786.59)(137.0749, 1443.0518)                                              | 3.47  |
| Benzoyl-D-Glucopyranose                                        | Glycosyl Ester // Aromatic Compound       | 1171431  | 1140574 | 1130778 | (284.0962, 48499.047)(285.09818, 4462.3833)(307.07968, 1163.3)                         | 2.14  |

|                                                                |                                                        |         |         |         |                                                                                                            |       |
|----------------------------------------------------------------|--------------------------------------------------------|---------|---------|---------|------------------------------------------------------------------------------------------------------------|-------|
| (Indol-3-yl)Acetyl-L-Glutamine                                 | Indole Derivative // Modified Amino Acid               | 1171431 | 1140574 | 1130778 | (284.0962, 48499.047)(285.09818, 4462.3833)                                                                | 2.14  |
| Tolcapone                                                      | C-Nitro Compound                                       | 1187543 | 1172960 | 1151551 | (274.06613, 81466.445)(275.06857, 8197.147)                                                                | 5.96  |
| Guanosine                                                      | Purine Ribonucleoside                                  | 1207329 | 1176965 | 1167587 | (284.0962, 51099.926)(285.09818, 4701.8164)(306.07654, 9602.907)(307.07968, 908.0234)(290.0825, 1887.1234) | 2.14  |
| 3''-Deamino-3''-Oxonicotianamine                               | Small Molecule                                         | 1202276 | 1177207 | 1167759 | (284.0962, 51099.926)(285.09818, 4701.8164)(306.07654, 9602.907)(307.07968, 908.0234)                      | 2.14  |
| Nicotinate D-Ribonucleotide                                    | Small Molecule                                         | 1279036 | 1225260 | 1259864 | (335.03598, 5989.5234)(315.0107, 15480.91)                                                                 | 0.26  |
| (3Z,6Z)-Nonadienal                                             | Aldehyde                                               | 1333055 | 1317822 | 1277203 | (143.08028, 38877.9)(144.08281, 860.33)                                                                    | 1.66  |
| Alpha;-Linolenate                                              | Long-Chain 2,3,4-Saturated Fatty Acid // Ω3 Fatty Acid | 1338949 | 1311732 | 1285502 | (277.2134, 53025.754)(278.2164, 7186.1997)                                                                 | 15.27 |
| Kaempferol 3-O-D-Glucosylgalactoside                           | Flavonol 3-O-Glycoside                                 | 1348089 | 1300396 | 1287902 | (612.1758, 7721.223)(613.17535, 1612.9067)                                                                 | 25.26 |
| (2S,3E)-2-Amino-4-(2-Aminoethoxy)But-3-Enoate                  | Oxyvinylglycine                                        | 1359988 | 1337209 | 1297544 | (143.08028, 38877.9)(144.08281, 860.33)(146.0912, 250.73502)(170.0792, 167.63)                             | 1.66  |
| N2,N2-Dihydroxy-L-Tryptophan                                   | N-Hydroxylated L-Amino Acid                            | 1509149 | 1459639 | 1436466 | (240.04817, 70419.13)(241.0509, 6154.6934)                                                                 | 2.94  |
| D-Tryptophan                                                   | Aromatic D-Amino Acid                                  | 1496799 | 1452068 | 1448922 | (205.09528, 70349.12)(206.09813, 6634.3164)(227.07664, 4658.5503)                                          | 4.28  |
| 2-Amino-6-Hydroxymethyl-7,7-Dimethyl-7,8-Dihydropteridin-4-One | Small Molecule                                         | 1539996 | 1483914 | 1486314 | (205.09528, 70349.12)(206.09813, 6634.3164)                                                                | 4.28  |

|                                                                        |                                      |         |         |         |                                                                                                                                  |       |
|------------------------------------------------------------------------|--------------------------------------|---------|---------|---------|----------------------------------------------------------------------------------------------------------------------------------|-------|
| 5'-Deoxyadenosine                                                      | Modified Nucleoside                  | 1547551 | 1569544 | 1529231 | (252.10718, 72485.195)(253.10962, 7264.22)(238.11346, 1751.39)                                                                   | 2.19  |
| 1-Stearoyl-Sn-Glycerol                                                 | 1-Acyl-Sn-Glycerol                   | 1973201 | 1710755 | 1531469 | (381.29297, 26002.463)(382.29587, 3363.4348)                                                                                     | 20.05 |
| S-(2-Aminoethyl)-L-Cysteine                                            | L-Cysteine-S-Conjugate               | 2191968 | 2175395 | 1533925 | (149.0581, 3869.5632)(152.05504, 3318.0066)                                                                                      | 2.83  |
| Cyanidin 3,7-Di-O-D-Glucoside                                          | Anthocyanidin 3,7-Di-O-B-D-Glucoside | 1623560 | 1570777 | 1542372 | (612.1758, 8434.604)(613.17535, 1762.6201)(611.1778, 12953.5205)                                                                 | 25.26 |
| Hesperidin                                                             | Flavanone Glycoside                  | 1623560 | 1570777 | 1542372 | (610.1774, 24965.875)(611.1778, 12953.5205)                                                                                      | 25.26 |
| Alizarin                                                               | Hydroxyanthraquinone                 | 1637438 | 1586061 | 1556236 | (240.04817, 70419.13)(241.0509, 6154.6934)(250.0359, 582.39)                                                                     | 2.94  |
| Tetraketide Pyrone                                                     | Polyketide                           | 1650819 | 1590943 | 1595201 | (223.09154, 4907.3003)(206.09813, 6518.1665)                                                                                     | 4.28  |
| (7S)-Trans-Hinokiresinol                                               | Trans-Hinokiresinol                  | 1678194 | 1742529 | 1682502 | (252.10718, 73427.56)(253.10962, 7383.31)(238.11346, 1781.3633)(255.12871, 1176.7167)(256.1261, 335.60336)(275.10672, 4003.1565) | 2.19  |
| Diisopropyl Fluorophosphate                                            | Small Molecule                       | 1866821 | 1682309 | 1826159 | (184.73358, 77937.664)(186.06607, 19109.182)(189.0423, 845.38666)                                                                | 1.39  |
| 2,4-Diamino-6-Ethyl-5,3'-(2-Cyclohexylphenoxy)Prop-1'-Yloxy pyrimidine | Small Molecule                       | 2273787 | 2144875 | 1998013 | (413.26138, 29248.43)(414.2642, 4829.777)(415.26672, 125.240005)                                                                 | 21.96 |

|                                                |                                                     |         |         |         |                                                                                                                  |       |
|------------------------------------------------|-----------------------------------------------------|---------|---------|---------|------------------------------------------------------------------------------------------------------------------|-------|
| (22R,23R)-22,23-Dihydroxy-Campest-4-En-3-One   | Brassinosteroid                                     | 2065308 | 2012244 | 2061785 | (453.33862, 93793.98)(454.34082, 20998.096)(455.34302, 1476.7201)                                                | 6.10  |
| 6-Diazo-5-Oxonorleucine                        | Modified Amino Acid                                 | 2108148 | 2082312 | 2078806 | (177.05347, 83174.09)(178.05617, 6248.8696)                                                                      | 7.36  |
| 3,5-Dimethoxyphenol                            | Small Molecule                                      | 2124202 | 2087590 | 2084042 | (177.05347, 83174.09)(178.05617, 6248.8696)                                                                      | 7.36  |
| Hypoglycin B                                   | Amino Acid Or Its Derivative                        | 2114356 | 2148647 | 2089439 | (252.10718, 60363.312)(253.10962, 6070.1567)                                                                     | 2.18  |
| Alliin                                         | S-Alkyl-L-Cysteine S-Oxide // Organosulfur Compound | 2171221 | 2178487 | 2164211 | (178.05617, 6520.56)(201.04121, 10886.9795)                                                                      | 7.36  |
| 4-Methoxycinnamate                             | Small Molecule                                      | 2299443 | 2246989 | 2243461 | (177.05347, 83174.09)(178.05617, 6248.8696)(203.38716, 2096.3633)(204.06064, 2165.13)                            | 7.36  |
| C <sub>26</sub> H <sub>37</sub> O <sub>4</sub> | Terpenoid Derivative                                | 2606761 | 2447689 | 2268650 | (413.26138, 32618.123)(414.2642, 5758.3496)(415.26672, 153.53)                                                   | 21.96 |
| Dalcochinin-8'-O-Glucoside                     | Isoflavone                                          | 2500173 | 2460247 | 2366759 | (575.2037, 119381.055)(576.206, 28796.867)(577.2063, 4438.41)                                                    | 6.70  |
| 5 Alpha;-Carboxystrictosidine                  | Small Molecule                                      | 2500173 | 2460247 | 2366759 | (575.2037, 119381.055)(576.206, 28796.867)                                                                       | 6.70  |
| Delta;-Tocotrienol                             | Tocotrienol                                         | 2398458 | 2381700 | 2373953 | (419.2799, 54042.98)(420.28174, 1657.07)(397.29855, 60526.0)(398.30032, 1539.3033)                               | 8.04  |
| N,N-Dihydroxy-L-Isoleucine                     | N-Hydroxylated L-Amino Acid                         | 1905260 | 325222  | 2430921 | (166.0853, 45848.22)(167.0879, 3519.1602)(185.06439, 83703.04)(186.0661, 19499.04)(187.064, 14371.038)(188.0674, | 1.86  |

|                                                        |                                                             |         |         |         |                                                                                                                                                                                                                                     |       |
|--------------------------------------------------------|-------------------------------------------------------------|---------|---------|---------|-------------------------------------------------------------------------------------------------------------------------------------------------------------------------------------------------------------------------------------|-------|
|                                                        |                                                             |         |         |         | 886.59)(168.06125,<br>2628.305)(170.0581, 156.15)                                                                                                                                                                                   |       |
| Dihydroconiferyl Aldehyde                              | Small Molecule                                              | 1905260 | 325222  | 2430921 | (182.07956,<br>11061.445)(183.0824,<br>799.325)(164.07236,<br>9954.865)(165.0757,<br>515.06)(166.0853,<br>45848.22)(167.0879,<br>3519.1602)(206.0789,<br>61.92)(186.73332,<br>15367.487)(187.46553,<br>11754.587)(188.0674, 886.59) | 1.86  |
| Kauralexin A2                                          | Kauralexin                                                  | 2716898 | 2592367 | 2646366 | (333.19986,<br>45602.594)(334.20267,<br>6650.31)(335.2138, 1066.27)                                                                                                                                                                 | 13.58 |
| 5-Amino-1-(5-Phospho-D-Ribosyl)Imidazole-4-Carboxamide | Carboxamide                                                 | 2790476 | 2724843 | 2714678 | (319.03937,<br>149745.45)(320.0419,<br>16677.469)(321.04034,<br>508.075)(341.01947, 616.77)                                                                                                                                         | 5.98  |
| 5z13e-15s-1115-Dihydroxy-9-Oxopros                     | Prostaglandin-Like Compound                                 | 3106714 | 1913953 | 3035916 | (333.19992,<br>51452.25)(334.20273,<br>7519.314)(335.21402,<br>1064.1533)(377.2254,<br>27828.56)(378.2282, 4831.28)                                                                                                                 | 13.58 |
| (3R)-Phenylalanine                                     | Aromatic L-Amino Acid // B<br>Amino Acid // Phenylpropanoid | 3461268 | 8464896 | 3304427 | (166.0854, 373521.16)(167.088,<br>29894.58)(188.06819,<br>115248.27)(189.07175,<br>17600.02)(170.05804, 2145.665)                                                                                                                   | 3.76  |
| 1,2-Dioctanoyl-1,2,4-Butanetriol                       | Small Molecule                                              | 3545045 | 3514131 | 3525200 | (340.25638,<br>171385.7)(341.2584, 13469.09)                                                                                                                                                                                        | 7.58  |
| 3-(1H-Indol-3-Yl)Propanoate                            | Indole Derivative                                           | 3796730 | 3867673 | 3628546 | (188.06927,<br>174342.47)(189.0718,<br>18017.588)(170.0581, 2147.2)                                                                                                                                                                 | 4.28  |
| 6-O-Methylnorlaudanoline                               | 6-O-Methylnorlaudanoline                                    | 4076098 | 3986453 | 3846893 | (303.13882,<br>204779.75)(304.1414,<br>20757.79)(305.141, 2395.39)                                                                                                                                                                  | 4.49  |
| Sphingosine 1-Phosphate                                | Sphingoid 1-Phosphate                                       | 4150799 | 3961988 | 3862403 | (360.7312, 30939.82)(361.7299,<br>4805.5366)(363.24258,                                                                                                                                                                             | 11.90 |

|                                                                   |                                                        |         |         |         |                                                                                                                              |       |
|-------------------------------------------------------------------|--------------------------------------------------------|---------|---------|---------|------------------------------------------------------------------------------------------------------------------------------|-------|
|                                                                   |                                                        |         |         |         | 268.83667)(362.23697, 18779.89)                                                                                              |       |
| 2,4-Diamino-6-Methyl-5,3'-(3-Nitrophenoxy)Prop-1'-Yloxypyrimidine | C-Nitro Compound                                       | 4475343 | 4370948 | 4220868 | (303.13882, 207849.92)(304.1414, 21141.521)(305.141, 2443.6033)                                                              | 4.49  |
| (E)-5-(Methylsulfanyl)Pentanal Oxime                              | (E)- $\Omega$ (Methylsulfanyl)Alkanal Oxime            | 4308349 | 4352712 | 4272274 | (133.05933, 1098.6034)(150.0756, 4448.8403)(153.05693, 5445.61)                                                              | 2.14  |
| Guanine                                                           | Purine // Purine Base                                  | 4308349 | 4352712 | 4272274 | (137.04506, 2986.8933)(152.05563, 118473.98)(153.05693, 5445.61)                                                             | 2.14  |
| Kauralexin B3                                                     | Kauralexin                                             | 4452581 | 4359015 | 4328898 | (315.19022, 155219.02)(316.19272, 23125.523)(317.1997, 2150.9834)                                                            | 14.95 |
| 3,7,3',4',5'-Pentamethylmyricetin                                 | Flavonol Derivative                                    | 4420335 | 4430267 | 4356132 | (411.11725, 3089.9)(391.13205, 5498.9766)                                                                                    | 6.16  |
| Secologanin                                                       | Secoiridoid // Terpene Glycoside                       | 4420335 | 4430267 | 4356132 | (389.13794, 241257.11)(390.14014, 32490.709)(391.13205, 5498.9766)(411.1173, 2971.41)                                        | 6.16  |
| Hederagenin                                                       | Triterpenoid                                           | 4575966 | 4457774 | 4500366 | (453.33862, 91577.04)(454.34082, 20404.953)(455.34302, 1435.48)(476.32382, 160675.36)(477.3252, 18823.715)(478.3274, 934.31) | 6.11  |
| Adenine                                                           | Purine // Purine Base                                  | 4767036 | 4816992 | 4663748 | (136.06136, 101441.27)(137.0617, 4176.72)                                                                                    | 2.13  |
| (2 <sub>;</sub> OH)-Gibberellin28                                 | Gibberellin                                            | 4947154 | 4944879 | 4859287 | (390.14014, 32490.709)(391.13205, 5498.9766)                                                                                 | 6.16  |
| 2-R-Hydroperoxy-Linolenate                                        | (2R)-2-Hydroperoxy Fatty Acid // Long-Chain Fatty Acid | 5222312 | 5096016 | 5084620 | (293.2081, 52210.81)(294.21094, 7526.457)(333.19907, 1030.2032)(315.19022, 153396.38)(316.19272, 22869.9)(317.2001, 2352.58) | 14.95 |



|                                |                                                                                               |         |         |         |                                                                                                                                   |       |
|--------------------------------|-----------------------------------------------------------------------------------------------|---------|---------|---------|-----------------------------------------------------------------------------------------------------------------------------------|-------|
| Heptanedioate                  | Small Molecule                                                                                | 5623987 | 5467105 | 5419568 | (163.03793, 220429.38)(164.0407, 16307.753)                                                                                       | 5.98  |
| 4-Hydroxycoumarin              | Aromatic Compound                                                                             | 5654984 | 5498468 | 5457679 | (163.03793, 220429.38)(164.0407, 16307.753)(145.02684, 1476.3766)(168.04893, 5177.217)(167.01064, 5883.1704)(168.0107, 874.29663) | 3.70  |
| 3,5-Dihydroxyanisole           | Small Molecule                                                                                | 5654984 | 5498468 | 5457679 | (124.03806, 3650.3567)(163.03793, 220429.38)(164.0407, 16307.753)(145.02684, 1476.3766)                                           | 5.98  |
| (R)-3-(4-Hydroxyphenyl)Lactate | 3-(4-Hydroxyphenyl)Lactate // (R)-3-(Aryl)Lactate                                             | 5999088 | 5838442 | 5764221 | (185.06374, 8170.0234)(163.03793, 226040.94)(164.0407, 16798.727)                                                                 | 5.98  |
| 4-Coumarate                    | 3-(Aryl)Acrylate // Hydroxylated Carboxylate // Phenylpropanoid                               | 6030084 | 5869805 | 5802331 | (163.03793, 226040.94)(164.0407, 16798.727)(145.02684, 1528.25)                                                                   | 5.98  |
| Hemanthamine                   | Small Molecule                                                                                | 6207315 | 6036241 | 5852777 | (301.13828, 95739.164)(302.14108, 12807.519)(303.14304, 1322.0634)(289.144, 1310.3999)                                            | 17.31 |
| 2-Trans-Abscisate              | Abscisic Acid                                                                                 | 6063617 | 6078504 | 5935946 | (268.1023, 310469.0)(269.1042, 30313.14)(270.10577, 2209.0735)                                                                    | 2.09  |
| 2'-Deoxyguanosine              | Purine 2'-Deoxyribonucleoside // Nucleic Acid Component                                       | 6147224 | 6167132 | 6010439 | (268.1023, 296796.03)(269.1042, 29040.11)(270.10577, 2092.8035)(290.0823, 539.0)                                                  | 2.09  |
| L-Isoleucine                   | Proteinogenic Amino Acid // Branched-Chain Amino Acid // Non-Polar Amino Acid // L-Amino Acid | 6709382 | 4319604 | 6214181 | (132.10126, 291880.06)(133.104, 15970.189)(114.0907, 163275.75)(115.09364, 8705.596)(154.08365, 1916.4299)(136.07217,             | 3.02  |

|                                 |                        |          |          |          |                                                                                                                                                                            |       |
|---------------------------------|------------------------|----------|----------|----------|----------------------------------------------------------------------------------------------------------------------------------------------------------------------------|-------|
|                                 |                        |          |          |          | 71861.836)(137.07501, 2271.885)                                                                                                                                            |       |
| Triethanolamine                 | Non-Metabolic Compound | 6994564  | 5797757  | 6495629  | (132.10088, 144032.48)(133.104, 15293.399)(160.10646, 3315.7366)                                                                                                           | 2.07  |
| Salicin                         | B-D Glucoside          | 6630422  | 6657607  | 6496154  | (269.1042, 30313.14)(270.10577, 2209.0735)                                                                                                                                 | 2.09  |
| Dioleoyl Phosphatidate          | Phosphatidate-36:2     | 7268635  | 7074680  | 6929909  | (698.4764, 3334.0469)(699.4783, 628.1883)                                                                                                                                  | 7.58  |
| Geranyl Acetate                 | Ester                  | 8985524  | 8849909  | 8596631  | (178.13261, 155662.08)(179.13512, 14189.239)                                                                                                                               | 3.95  |
| Difluoromethylornithine         | Small Molecule         | 8438432  | 8464896  | 8615269  | (166.08534, 359770.66)(167.08794, 28909.057)(208.09447, 2556.14)                                                                                                           | 2.73  |
| Pheophytin A                    | Pheophytin             | 9904414  | 9247602  | 8910259  | (871.5639, 10006.641)(872.56696, 4303.1196)(871.5666, 147209.67)(872.56915, 82135.586)(873.5708, 19711.652)(874.5727, 1409.4733)(893.54535, 6375.013)(894.5484, 2440.3567) | 29.02 |
| 2-(2-Methylpyridin-3-Yl)Ethanol | Pyridine               | 1.02E+07 | 9801032  | 9619782  | (120.0803, 416368.78)(121.08304, 30765.797)                                                                                                                                | 2.73  |
| Tyramine                        | Aralkylamine           | 1.09E+07 | 1.05E+07 | 1.03E+07 | (120.08033, 421962.9)(121.08304, 31168.062)                                                                                                                                | 2.73  |
| Gypsogenin                      | Triterpenoid           | 1.08E+07 | 1.06E+07 | 1.06E+07 | (453.33862, 88106.52)(454.34082, 19505.984)(455.34302, 1371.2133)(475.3212, 615162.2)(476.32382, 154402.86)(477.3252, 17947.717)(478.3274, 885.13666)                      | 6.11  |

|                      |                                              |          |          |          |                                                                                                                                                      |      |
|----------------------|----------------------------------------------|----------|----------|----------|------------------------------------------------------------------------------------------------------------------------------------------------------|------|
| 3-Chlorobenzaldehyde | Aromatic Aldehyde // Chloroaromatic Compound | 1.28E+07 | 4816246  | 1.16E+07 | (143.0006, 172752.53)(144.00212, 7906.652)(147.02177, 9185.592)                                                                                      | 0.95 |
| Cinchonidine         | Alkaloid                                     | 1.24E+07 | 1.19E+07 | 1.19E+07 | (296.19427, 182339.69)(297.19656, 24887.938)(298.1984, 440.55664)                                                                                    | 2.63 |
| Choline              | Quaternary Amine                             | 1.86E+07 | 1.79E+07 | 1.72E+07 | (104.1067, 513081.75)(105.1095, 22823.766)                                                                                                           | 1.63 |
| Canthaxanthin        | Ketocarotenoid                               | 3.13E+07 | 3.05E+07 | 3.00E+07 | (566.42194, 150616.03)(567.4242, 44119.387)(568.42584, 5710.2817)(588.40424, 1269720.9)(589.40753, 415177.4)(590.4092, 68645.9)(591.4103, 6260.0864) | 6.96 |
